# Supplementary material for: A Study of the Molecular Regulatory Network of VcTCP18 during Blueberry Bud Dormancy
Source: MDPI journal article supplement (doi:10.3390/plants12142595), 2023-07-09
Supplement: s1 [file s1]

## Supplementary Material

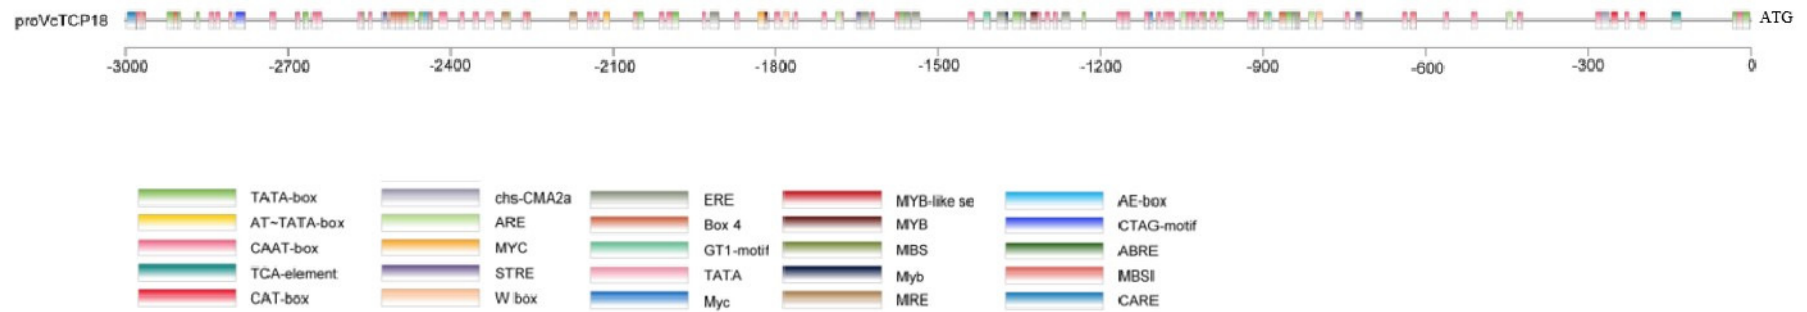

Figure S1. Cis-acting sequence elements of the *VcTCP18* promoter. The different colored rectangles indicated divergent cis-elements.

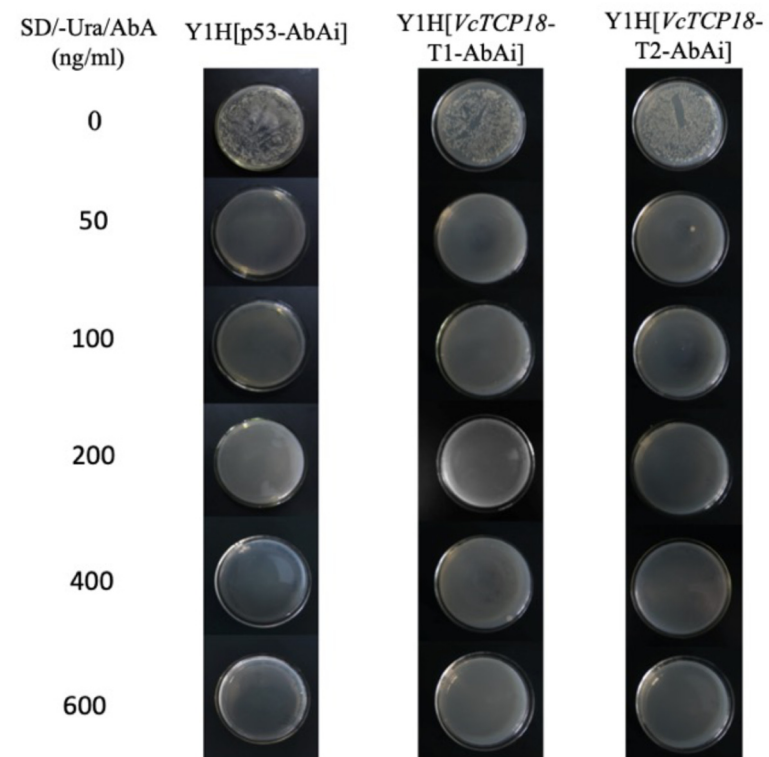

Figure S2. Background level detection.

**Table S 1** The primers used in RT-qPCR.

| Gene name      | Forward primer (5'–3') | Reverse primer (3'–5')  |
|----------------|------------------------|-------------------------|
| <i>VcTCP18</i> | ATCGAGGGATAAAGCAAGAGC  | TCACGGCTTCCAGAGTTTG     |
| <i>VcGAPDH</i> | CGGCTACTTACGAGCAAATCAA | TTCAGTGTAGCCCAAATTCCTTT |

**Table S2** The primers for cloning *VcTCP18* promoters

| Name                         | Forward primer (5'–3')          | Reverse primer (3'–5')           |
|------------------------------|---------------------------------|----------------------------------|
| pro <i>VcTCP18-1381Z</i>     | CGGGATCC CACCAAGATTATTGACCGTA   | TGCACTGCAG GAGAAAAAGTTGGCTAGAGAG |
| T1- pAbAi                    | GGGGTACC GACCGTAAAAAAGGATCTC    | GCGTCGAC TGTAATTGGGTGGGA         |
| T2- pAbAi                    | GGGGTACC GGGTTGTTTCATTTACTTTCT  | GCGTCGAC GGTAGAGGAGTTAGTTCAT     |
| pro <i>VcTCP18</i> -LUC 0800 | TGCACTGCAG CACCAAGATTATTGACCGTA | CGGGATCC GAGAAAAAGTTGGCTAGAGAG   |
| P1 <i>VcTCP18</i> -LUC 0800  | TGCACTGCAG AGTTTCTAACAATTGGCAC  | CGGGATCC GAGAAAAAGTTGGCTAGAGAG   |
| P2 <i>VcTCP18</i> -LUC 0800  | TGCACTGCAG GCCTTCTCTCTCTCTCTC   | CGGGATCC GAGAAAAAGTTGGCTAGAGAG   |
